# Supplementary material
Source: publisher site journal article supplement (https://www.degruyter.com/publication/journal_key/BIOL/downloadAsset/BIOL_SI%20Advances%20in%20Neurodegenerative%20Disease%20Research%20and%20Treatment.pdf)
Supplement: Supplementary file 1 [file BIOL_SI%20Advances%20in%20Neurodegenerative%20Disease%20Research%20and%20Treatment.pdf]

# SPECIAL ISSUE: ADVANCES IN NEURODEGENERATIVE DISEASE RESEARCH AND TREATMENT

## OPEN LIFE SCIENCES

Impact  
Factor:  
2.2

GUEST EDITORS:

Zhongjie Shi, MD, PhD,  
Silvia Honda Takada, PhD

### Scope

Neurodegenerative diseases, most often seen as the Alzheimer's disease, the Parkinson's disease, and the Huntington's disease, are chronic and progressive. They can affect the nervous system by causing the loss of neurons and their function over time, which have a long-lasting impact on patients, as well as the whole society. The decades of intensive research efforts in the study of neurodegenerative diseases produce no complete cure, and treatments are mostly symptom-relieving.

This special issue aims to update recent advances in the research and treatment of neurodegenerative disease so as to provide a platform for researchers to share their experience, challenges, and opportunities in this field.

We welcome original research papers and reviews to cover topics including but not limited to:

- Molecular, cellular, genetics, and genomics mechanisms of neurodegenerative diseases
- Biomarkers for early diagnosis and monitoring of progression of neurodegenerative disease
- Novel therapeutic targets and drug development of neurodegenerative diseases
- Translational research and clinical trials of neurodegenerative diseases

***Deadline for submissions:  
March 31st, 2024***

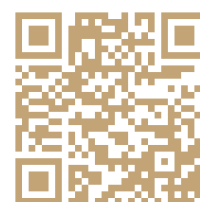

**SUBMIT HERE**

In case of any questions please contact:  
Izabela Żarczyńska (Izabela.Zarczyńska@degruyter.com)  
Managing Editor, Open Life Sciences

# SPECIAL ISSUE: ADVANCES IN NEURODEGENERATIVE DISEASE RESEARCH AND TREATMENT

# OPEN LIFE SCIENCES

Impact  
Factor:  
2.2

GUEST EDITORS:

Zhongjie Shi, MD, PhD,  
Silvia Honda Takada, PhD

## How to submit

*Authors are kindly invited to submit their contribution via online submission system Editorial Manager available at:*

**<https://www.editorialmanager.com/openbiol/default1.aspx>**

**Please remember to select article type: SI: Advances in Neurodegenerative Disease Research and Treatment to ensure that your manuscript will be processed with the highest priority.**

Before completing their manuscript, authors should carefully read the journal's Instruction for Authors located at:

**[https://www.degruyter.com/publication/journal\\_key/BIOL/downloadAsset/BIOL\\_Instruction%20for%20Authors.pdf](https://www.degruyter.com/publication/journal_key/BIOL/downloadAsset/BIOL_Instruction%20for%20Authors.pdf)**

### **Contributors to the Special Issue will benefit from:**

- indexation in Web of Science, PubMed, PubMed Central, SCOPUS, DOAJ, Google Scholar
- 20% discount on Article Processing Charges
- quick and constructive peer review provided by experts in the field
- no space constraints
- convenient, web-based paper submission and tracking system – Editorial Manager
- quick online publication upon completing the publishing process (continuous publication model)
- better visibility due to Open Access
- long-term preservation of the content (articles archived in Portico)

***Deadline for submissions:  
March 31st, 2024***

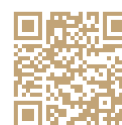

**SUBMIT HERE**

In case of any questions please contact:  
**Izabela Żarczyńska (Izabela.Zarczynska@degruyter.com)**  
Managing Editor, Open Life Sciences
